# Supplementary material for: Dissolved Pb and Pb isotopes in the North Atlantic from the GEOVIDE transect (GEOTRACES GA-01) and their decadal evolution
Source: Copernicus journal article supplement (doi:10.5194/bg-15-4995-2018), 2018-08-22
Supplement: Supplementary file 1 [file bg-15-4995-2018-supplement.pdf]

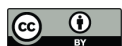

*Supplement of*

**Dissolved Pb and Pb isotopes in the North Atlantic from the GEOVIDE transect (GEOTRACES GA-01) and their decadal evolution**

**Cheryl M. Zurbrick et al.**

*Correspondence to:* Edward A. Boyle (eaboyle@mit.edu)

The copyright of individual parts of the supplement might differ from the CC BY 4.0 License.

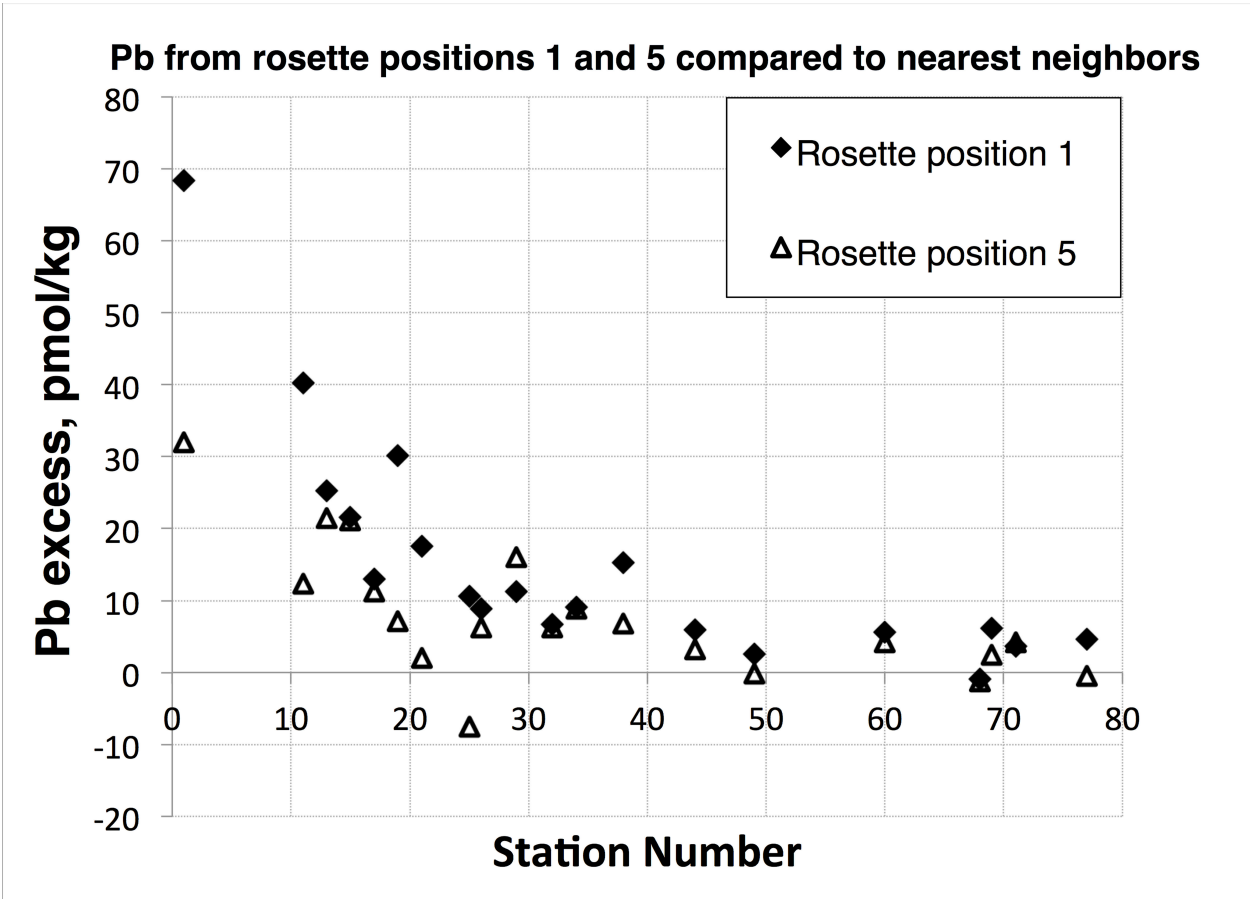

Figure S1: Plot of the difference in Pb concentration between GoFlo bottles 1 and 5 and their nearest respective bottles shows a wash-out effect.

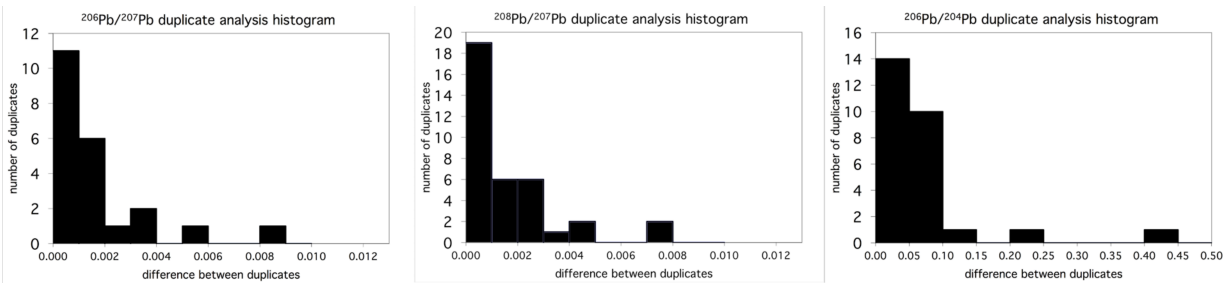

Figure S2: Replicate Pb isotope analyses: histogram of difference between duplicates.

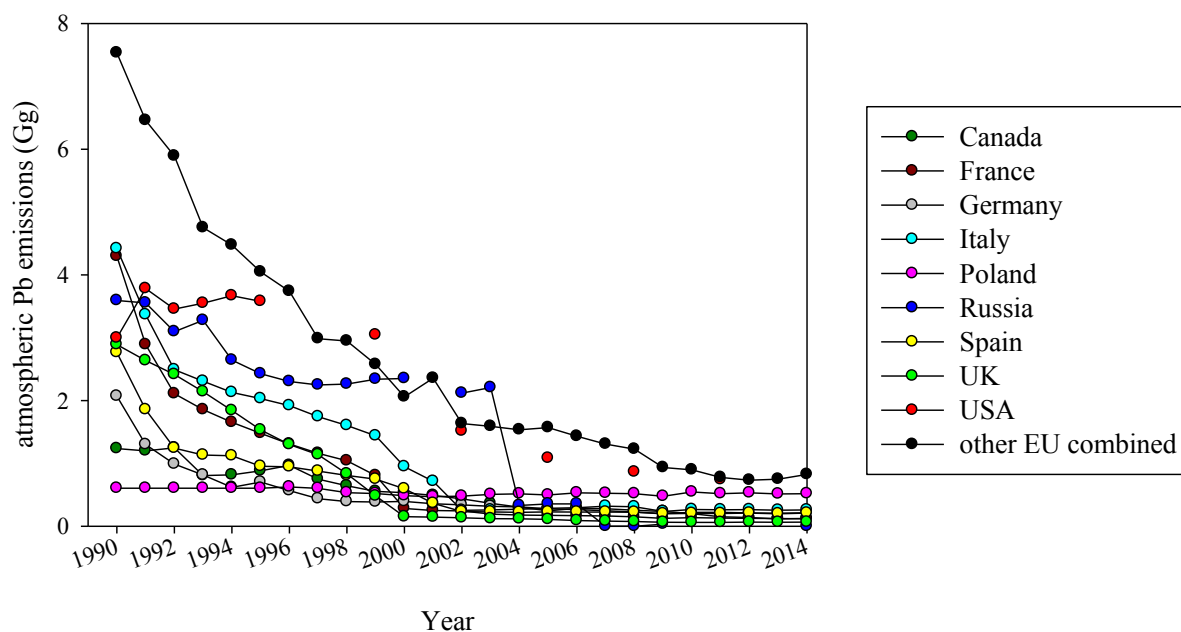

Figure S3: Atmospheric emissions by nation, 1990 – 2014 (EMEP, 2017). Other EU combined nations include: Albania, Armenia, Austria, Azerbaijan, Belarus, Belgium, Bulgaria, Croatia, Cyprus, Czech Republic, Denmark, Estonia, Finland, Georgia, Greece, Hungary, Ireland, Kazakhstan, Kyrgyzstan, Latvia, Liechtenstein, Lithuania, Luxembourg, Malta, Monaco, Montenegro, Netherlands, Norway, Portugal Republic of Moldova, Romania, Serbia, Slovakia, Slovenia, Sweden, Switzerland, the former Yugoslav Republic of Macedonia, Turkey, and Ukraine.
